# Supplementary material for: Comprehensive screening of target molecules by next-generation sequencing in patients with malignant solid tumors: guiding entry into phase I clinical trials
Source: Mol Cancer. 2016 Nov 16;15:73. doi: 10.1186/s12943-016-0553-z (PMC5112718; doi:10.1186/s12943-016-0553-z)
Supplement: Additional file 2: Table S1. — List of patients registered into the study. (XLSX 21 kb) [file 12943_2016_553_MOESM2_ESM.xlsx]

## Sheet: Sheet1
Table S1. List of patients registered into the study.
No	Disease	Histological diagnosis	Sample	Surgery: 0 Biopsy: 1	Primary: 0 Meta: 1	Tumor size (cm)	Tumor cell content	DNA amount (μg）	DNA quality	NAC No: 0, Yes: 1	Analysis No: 0 Yes: 1	Reason for being unable to analyze*
1	H										0	1
2	H	Adenoca.	Liver	0	0	1.3×1.0	50	1.62	0.49		1
3	G	Signet ring cell ca.	Stomach	0	0	4.1×1.7	70	9.84	0.37	0	1
4	H										0	1
5	Br	IDC		0	0	2.7×1.7	15	4.38	0.71	1	1
6	Br	IDC	Mammary gland	0	0	2.8×2.2	10	6.42	0.17	0	1
7	Cx										0	3
8	G										0	4
9	G										0	3
10	Br	IDC	Mammary gland	1	0	1.3×0.1	50	0.73	0.27	0	1
11	Ov	Serous adenoca.	Omentum	0	0	2.2×1.8	60	18.84	0.6	1	1
12	G	M/D adenoca.	Stomach	1	0	0.4×0.4	40	1.3	0.82	0	1
13	Cx	Squamous ca.	Lymph node	0	1	1.9×0.7	70	25.56	0.76	0	1
14	Br	IDC	Mammary gland	0	0	2.7×2.2	40-50	9.96	0.1	0	1
15	G	M/D adenoca.	Stomach	1	0	0.2×0,2	10	0.69	1.39	0	1
16	G	P/D adenoca.	Stomach	0	0	3.2×1.6	40	5.44	1.04	0	1
17	Br										0	7
18	Br										0	3
19	Ov	Adenoca.	Ovary	0	0	2.8×2.8	10	5.26	0.37	1	1
20	Br										0
21	G	M-W/D adenoca.	Stomach	1	0	0.2×0.1	30	1.1	0.36	0	1
22	Br	IDC	Mammary gland	0	0	2.7×2.7	30-40	14.04	0.37	0	1
23	Ov	Adenoca.	Rectum	0	1	3.3×1.7	20	2.4	0.45	0	1
24	G	Signet ring cell ca.	Stomach	0	1	4.6×1.6	40	6.78	0.3	1	1
25	G	M-P/D adenoca.	Stomach	1	0	0.2×0.1	60	0.41	1.35	0	1
26	Br	IDC	Mammary gland	0	0	2.7×2.3	20-25	5.52	0.12	0	1
27	Br	IDC	Mammary gland	0	0	2.5×2.0	40	8.58	0.5	1	1
28	Br	IDC	Chest wall	0	1	2.8×2.4	25-30	5.21	0.51	0	1
29	G	Signet ring cell ca.	Stomach	1	0	0.3×0.2	35	1.18	1.19	0	1
30	Br	ILC	Mammary gland	0	0	2.7×2.2	15-20	5.88	0.16	0	1
31	Ov										0	6
32	Br	IDC	Mammary gland	0	0	2.3×2.0	30-40	7.5	0.84	0	1
33	G	M-W/D adenoca.	Stomach	0	0	4.6×1.7	50	7.98	0.29	0	1
34	Br										0	1
35	G										0	6
36	G	P/D adenoca.	Stomach	1	0	0.2×0.2	40	0.58	1.07	0	1
37	Ov	Serous adenoca.	Ovary	0	0	2.6×2.1	90	9.78	0.39	0	1
38	G	M-P/D adenoca.	Stomach	1	0	0.3×0.3	40	3.27	0.98	0	1
39	G										0	1
40	G	P/D adenoca.	Stomach	0	0	3.2×3.2	70	9.72	0.9	0	1
41	Br	IDC	Mammary gland	0	0	2.7×1.9	30-40	8.7	0.97	1	1
42	Ov	Serous adenoca.	Ovary	0	0	2.4×1.7	90	13.32	0.3	1	1
43	G										0	1
44	Br										0	3
45	Br	IDC	Mammary gland	0	0	2.9×2.5	30	2.8	1.11	1	1
46	Br	IDC	Mammary gland	0	0	2.2×1.8	25-30	9.06	0.59	0	1
47	G	Signet ring cell ca.	Stomach	1	0	0.2×0.1		0.27	1.23	0	1
48	G	W/D adenoca.	Stomach	1	0	0.7×0.2	70	4.2	0.87	0	1
49	Br	IDC	Mammary gland	0	0	2.7×2.0	25-30	3.27	0.47	0	1
50	G	Signet ring cell ca.	Stomach	0	1	2.7×1.5	80	12.8	0.45	0	1
51	G										0	2
52	G	M-P/D adenoca.	Stomach	0	0	4.0×1.3	30	11.04	0.41	0	1
53	Ov	Clear cell ca.	Ovary	0	0	2.6×1.9	90	4.42	0.27	0	1
54	Ov	Endometrioid adenoca.	Ovary	0	0	2.5×2.2	10	4.25	0.53	1	1
55	Br										0	1
56	Ov	Serous adenoca.	Ovary	0	0	1.6×1.3	30	3.17	0.56	1	1
57	G										0	1
58	Br	IDC	Mammary gland	1	0	1.4×0.1	80	1.27	0.19	1	1
59	Br	IDC	Mammary gland	0	0	2.7×2.1	20	3.6	0.47	0	1
60	G	M-W/D adenoca.	Stomach	1	0	0.5×0.1	20	0.94	1.29	0	1
61	Br	IDC	Mammary gland	0	0	2.8×2.1	30	2.8	0.91	0	1
62	Br	IDC	Mammary gland	0	0	2.9×1.8	25	11.28	0.3	1	1
63	Em	Endometrioid adenoca.	Uterine body	0	0	2.9×2.2	80	6.84	0.64	0	1
64	Br	IDC	Mammary gland	0	0	2.9×2.3	30-40	6.36	0.62	1	1
65	G	P/D adenoca.	Stomach	0	0	3.6×1.2	90	28.68	0.32	0	1
66	G	Endocrine cell ca.	Stomach	1	0	0.4×0.4	70	3.54	0.99	0	1
67	Br										0	8
68	Br										0	2
69	Cx	Adenosquamous ca.	Uterin cervix	1	0	0.7×0.7	60-70	3.27	0.23	0	1
70	G	M-W/D adenoca.	Stomach	1	0	0.2×0.1	40	1.15	1.17	0	1
71	Br	IDC	Mammary gland	0	0	2.8 ×2.2	20	4.71	0.24	0	1
72	G	Signet ring cell ca.	Stomach	1	0	0.3×0.3	20	1.42	0.82	0	1
73	G	Signet ring cell ca.	Stomach	1	0	0.4×0.4	40	2.64	0.95	0	1
74	Cx	Mucinous adenoca.	Uterin cervix	0	0	2.7×2.1	50	15.72	0.78	0	1
75	G	M-P/D adenoca.	Stomach	0	0	4.4×1.9	20	10.08	0.23	0	1
76	L	Squamous ca.	Lung	0	0	2.7×2.0	70	4.62	0.72	0	1
77	Ov										0	4
78	L	P/D adenoca.	Lung	0	0	2.8×1.5	40	10.2	0.47	0	1
79	L										0	1
80	H	Ductal adenoca.	Liver	0	0	3.0×1.9	25	9.9	0.66	0	1
81	H	M/D adenoca.	Liver	0	0	4.2×1.5	20	4.19	0.52	0	1
82	L	P/D adenoca.	Lung	0	0	2.4×2.2	40	11.34	0.44	0	1
83	H	Ductal adenoca.	Vatar's papilla	0	0	4.2×2.0	20	0.97	0.14	0	1
84	G	M-P/D adenoca.	Stomach	1	0	0.6×0.4	30	2.08	1.07	0	1
85	Br										0	4
86	H	M/D adenoca.	Liver	0	0	2.8×2.1	20-30	2.29	0.58	0	1
87	L	Adenoca.	Chest wall	0	1	0.9×0.3	50	1.11	0.36	0	1
88	Ov	Serous adenoca.	Ovary	0	0	2.5×1.4	60-70	4.08	0.2	0	1
89	G	W/D adenoca.	Stomach	0	0	3.9×1.2	60	9.06	0.65	0	1
90	Ov	Adenoca.	Ovary	0	0	3.6×2.0	25	3.07	0.53	1	1
91	Em	Endometrioid adenoca.	Uterine body	0	0	2.3×2.1	50-60	2.46	0.27	0	1
92	G	P/D adenoca.	Stomach	0	0	4.2×1.5	10	7.56	0.71	0	1
93	Cx										0	7
94	Br										0	3
95	Br	IDC	Mammary gland	0	0	2.5×1.6	30-40	4.69	0.51	1	1
96	L	Squamous ca.	Lung	0	0	2.7×1.7	60	5.53	0.44	0	1
97	Br	Adenoca.	Skin	0	1	1.4×1.0	70	5.21	0.57	0	1
98	Br	IDC	Mammary gland	0	0	2.6×2.2	70-80	3.56	0.59	0	1
99	Ov	Serous adenoca.	Ovary	0	0	2.8×2.2	20	8.4	0.53	1	1
100	Br	IDC	Mammary gland	0	0	2.6×2.2	15-20	4.41	0.89	0	1
101	G	M-P/D adenoca.	Stomach	1	0	0.5×0.1	30	1.6	0.29	0	1
102	Br	IDC	Mammary gland	0	0	2.8×2.2	15-20	3.69	0.18	0	1
103	Br	IDC	Mammary gland	0	0	2.7×2.1	25	5.07	1.84	0	1
104	H	Ductal adenoca.	Biliary duct	0	0	2.5×1.1	10	2.2	0.29	0	1
105	G	M/D adenoca.	Stomach	1	0	0.3×0.2	30	1.02	0.99	0	1
106	L										0	3
107	Co	M-W/D adenoca.	Rectum	0	0	3.7×2.0	30	18	0.39	0	1
108	Co	M-P/D adenoca.	Rectum	0	0	2.1×1.9	15	9.54	0.25	1	1
109	L										0	3
110	S (Other)	Ewing sarcoma	Soft tissue	0	0	2.8×2.0	80	30.48	0.33	0	1
111	H	ductal adenoca.	Liver	0	0	3.4×1.5	15	14.16	0.25	0	1
112	Cx										0	5
113	G	Signet ring cell ca.	Stomach	0	0	4.4×1.3	20-30	10.74	0.16	0	1
114	Br										0	4
115	Co	Ductal adenoca.	Liver	0	1	3.5×1.9	20	11.1	0.31	0	1
116	G										0	7
117	Br	IDC	Mammary gland	0	0	2.7×2.2	70	8.74	0.61	0	1
118	G										0	1
119	G	Signet ring cell ca.	Stomach	0	0	4.4×1.5	30-40	24.36	0.31	0	1
120	G										0	7
121	Br										0	7
122	Co										0	3
123	H										0	1
124	G										0	2
125	L	Adenoca.	Lymph node	1	1	0.8×0.6	70	6.16	0.34	0	1
126	G	W/D adenoca.	Stomach	1	0	0.2×0.1	40	1.09	0.96	0	1
127	Br										0	3
128	Other	Squamous ca.	Lung	0	1	2.2×2.0	50	20.9	0.32	0	1
129	G										0	6
130	H	Adenoca.	Gallbladder	0	0	3.7×2.0	30	10.93	0.17	0	1
131	Ov	Serous adenoca.	Ovary	0	0	2.7×1.8	70	12.45	0.17	0	1
132	Br										0	1
133	Br	Carcinoma	Liver	1	1	1.3×0.1	40	1.71	0.52	0	1
134	Br	IDD	Mammary gland	1	0	1.3×0.1	40	1.83	0.7	0	1
135	Ov	P/D adenoca.	Omentum	0	0	3.3×1.2	20	8.55	0.29	1	1
136	Br	IDC	Mammary gland	0	0	2.7×2.0	30	6.1	0.49	1	1
137	Ov										0	3
138	Br	IDC	Skin	1	1	0.8×0.1	70	1.42	0.89	0	1
139	Ov	Adenoca.	Skin	1	1	2.5×1.7	40	14.25	0.24	0	1
140	S(Other)	Synovial sarcoma	Lung	0	1	2.0×1.5	95	17.58	0.47	0	1
141	Br	Adenoca.	Liver	1	1	1.1×0.1	70	0.73	0.26	0	1
142	Ov										0	3
143	Ov	Serous adenoca.	Omentum	0	0	2.4×1.3	40	11.2	0.11	0	1
144	Br	IDC	Mammary gland	0	0	2.8×1.5	20	5.28	0.36	1	1
145	L	Adenoca.	Lung	0	0	2.7×1.8	20	20.52	0.18	0	1
146	Ov	Serous adenoca.	Ovary	0	0	2.7×2.2	20-30	12.73	0.23	1	1
147	Ov										0	1
148	Ov										0	3
149	Cx	Squamous ca.	Uterine body	0	0	2.7×1.6	60	11.5	0.18	0	1
150	Br										0	8
151	Ov	Serous adenoca.	Omentum	0	0	2.1×0.9	80	7.45	0.4	0	1
152	Ov	Serous adenoca.	Ovary	0	0	2.5×2.1	30	6.71	0.44	1	1
153	G	M-P/D adenoca.	Stomach	1	0	4.6×1.6	20	11.97	0.17	0	1
154	Ov										0	3
155	L	Adenoca.	Lymph node	1	1	0.5×0.2	25	0.27	0.6	0	1
156	Ov										0	3
157	G										0	1
158	Ov	Serous adenoca.	Ovary	0	0	2.3×1.6	60	22.04	0.14	0	1
159	Ov	Serous adenoca.	Ovary	0	0	2.6×1.9	10	9.08	0.46	1	1
160	Ov	Adenoca.	Ovary	0	0	2.8×2.3	20	12.83	0.2	1	1
161	Ov										0	3
162	Br	IDC	Mammary gland	1	0	1.4×1	40	2.17	0.23	0	1
163	G	P/D adenoca.	Stomach	1	0	0.2×0.1	10	0.47	0.52	0	1
164	L	M/D adenoca.	Lung	0	0	2.7×1.7	80	27.55	0.45	0	1
165	L	M/D adenoca.	Lung	0	0	2.7×2.0	50	15.49	0.31	0	1
166	H										0	3
167	Br										0	4
168	Br	IDC	Mammary gland	1	0	Unknown	10	0.41	0.21	1	1
169	Other	Carcinoma	Pleura	1	0	Unknown	70	10.64	0.37	0	1
170	Other										0	3
171	Other	Squamous ca.	Lung	0	0	2.7×2.2	70	11.3	0.58	0	1
172	H										0	1
173	Other	HCC	Liver	0	0	3.3×2.2	30	5.95	0.12	0	1
174	Em	Adenoca.	Uterine body	0	0	1×0.4	30-40	2.7	0.25	0	1
175	L	Adenoca.	Lung	0	0	Unknown	10	1.51	0.16	0	1
176	G	M-W/D adenoca.	Stomach	0	0	Unknown	30-40	11.4	0.3	0	1
177	L	Adenoca.	Lung	0	0	2.6×1.7	30	3.88	0.3	0	1
178	Other	Neuroendocrine ca.	Liver	1	1	1.2×0.1	40	0.43	0.42	0	1
179	H										0	1
180	Other	Thymoma	Thymus	1	0	2.6×2.3	60	1.02	0.21	0	1
181	G	M/D adenoca.	Stomach	1	0	0.2×0.1	40	0.66	0.56	0	1
182	Cx	Squamous ca.	Uterin cervix	1	0	2.2×2.0	10	3.02	0.48	0	1
183	Other	Mixed ductal endocrine ca.	Liver	1	1	0.5×0.5	90	1.15	0.24	0	1
*Reason for being unable to analyze：
1: low tumor cell rate, 2: low DNA volume, 3: low DNA quality, 4: low DNA volume and quality, 5: poor library for NGS, 6: low NGS date quality, 7: sample not enogh to analize, 8: Best supportive care
Br: Breast cancer, Ov: Ovarian cancer, Cx: Cervical cancer, Em: Endometrial cancer, G: Gastric cancer, L: Lung cancer, H: Hepatocellular cancer, Co: Colorectal cancer
IDC: invasive ductal carcinoma, P/D adenoca.: Poorly differentiated adenocarcinoma, M/D adenoca.: Moderaterly differentiated adenocarcinoma, W/D adenoca.: Well differentiated adenocarcinoma, ca.:carcionma
NAC: neoadjuvant chemotherapy
