# Supplementary material for: Comprehensive screening of target molecules by next-generation sequencing in patients with malignant solid tumors: guiding entry into phase I clinical trials
Source: Mol Cancer. 2016 Nov 16;15:73. doi: 10.1186/s12943-016-0553-z (PMC5112718; doi:10.1186/s12943-016-0553-z)
Supplement: Additional file 3: Table S5. — List of identified mutations after SNP elimination. (XLSX 27 kb) [file 12943_2016_553_MOESM3_ESM.xlsx]

## Sheet: Sheet1
Table S5. List of identified mutations after SNP elimination.
Patient	Chr	Position	Reference	Observed	Gene	AA_change	Report
2	2	209113113	G	A	IDH1	R132C	Y
	5	35873647	T	A	IL7R	Y201X	Y
	10	123279562	C	A	FGFR2	W290C	Y
3	1	120548095	C	T	NOTCH2	R91Q	Y
	5	149501544	G	A	PDGFRB	S748L
	17	37879658	G	A	ERBB2	R678Q	Y
5	7	55268963	T	C	EGFR	V1010A
	17	7577570	C	T	TP53	M237I	Y
6	17	7578478	G	C	TP53	P151R	Y
	17	41226540	T	C	BRCA1	Splicing	Y
10	2	29456531	C	T	ALK	G796E
	17	29670047	G	C	NF1	M2361I
11	13	32914472	C	T	BRCA2	Q1994X	Y
	17	7578235	T	C	TP53	Y205C	Y
12	5	35876272	T	C	IL7R	V355A
	17	7578406	C	T	TP53	R175H	Y
	17	12011128	G	T	MAP2K4	E179X	Y
	19	11097174	C	T	SMARCA4	P222L
13	2	29416520	A	G	ALK	M1478T
14	3	178936091	G	A	PIK3CA	E545K	Y
	6	117709135	A	T	ROS1	W608R
	9	135771987	-	GCT	TSC1	S1043dup
16	8	32617801	G	A	NRG1	S387N
19	17	41222946	A	G	BRCA1	F1662S	Y
21	17	7578190	T	C	TP53	Y220C	Y
22	1	162740165	A	G	DDR2	N456S	Y
	6	161491746	A	G	MAP3K4	K605R	Y
23	2	212578302	C	T	ERBB4	G319R
24	9	5044405	-	A	JAK2	F118fs	Y
25	16	3778116	G	A	CREBBP	P2311L
	17	7577124	C	T	TP53	V272M	Y
26	1	27092740	G	-	ARID1A	G921fs	Y
	9	139391840	G	T	NOTCH1	N2117K
	13	32907420	-	A	BRCA2	G602fs	Y
27	7	140481447	T	G	BRAF	D454A
	9	135776993	T	G	TSC1	S829R
	14	105246551	C	T	AKT1	E17K	Y
28	2	212251634	C	T	ERBB4	R1142Q
	13	49039470	C	G	RB1	L819V
	14	105246551	C	T	AKT1	E17K	Y
29	9	98240437	G	C	PTCH1	T416S	Y
30	17	37881000	G	T	ERBB2	V777L	Y
32	3	178936092	A	T	PIK3CA	E545V	Y
	19	15311613	C	T	NOTCH3	G35E
33	7	148507479	T	-	EZH2	R659fs	Y
	16	3900665	G	T	CREBBP	T144N
	17	7578406	C	T	TP53	R175H	Y
36	2	30142978	C	A	ALK	G183V
	2	111881355	G	C	BCL2L11	E11D
	6	117684017	G	C	ROS1	P1044A
	7	55233039	G	T	EGFR	A597S
	9	21971111	G	A	CDKN2A	H83Y	Y
	13	32907035	CTTGAAT	TATCCTAA	BRCA2	L474fs	Y
	17	7578406	C	T	TP53	R175H	Y
	18	48591925	G	T	SMAD4	C363F
37	13	32913346	T	A	BRCA2	D1618E	Y
	17	7577114	C	T	TP53	C275Y	Y
38	6	117710753	T	C	ROS1	N507D
40	7	148529785	T	C	EZH2	N102D	Y
	9	98222037	T	G	PTCH1	D911A	Y
	12	56482425	G	A	ERBB3	G325R	Y
	19	11105651	G	A	SMARCA4	E523K
41	15	99442822	C	T	IGF1R	L407F
42	7	116339770	T	G	MET	L211W
	17	7577509	C	T	TP53	E258K	Y
45	6	161455407	G	A	MAP3K4	R90Q
46	3	178936091	G	A	PIK3CA	E545K	Y
	5	149504392	G	A	PDGFRB	R604C	Y
47	17	7577120	C	T	TP53	R273H	Y
48	17	7577097	C	A	TP53	D281Y	Y
	17	7578263	G	A	TP53	R196X	Y
49	9	139391634	C	A	NOTCH1	G2186V
	17	40500497	C	T	STAT3	R13Q
50	3	178936082	G	A	PIK3CA	E542K	Y
	12	25398285	C	G	KRAS	G12R	Y
	15	66727483	G	A	MAP2K1	D67N	Y
	17	29652944	A	G	NF1	T1648A
52	3	52588791	G	T	PBRM1	P1413T
	4	153244259	T	C	FBXW7	X633W
	5	35876182	A	G	IL7R	Q325R
	9	139408977	C	T	NOTCH1	R731Q
	15	90631594	G	T	IDH2	D225E
	17	7577536	T	C	TP53	R249G	Y
56	2	29917716	C	T	ALK	G318S
	9	139391840	G	T	NOTCH1	N2117K
	13	32954009	C	T	BRCA2	Q3026X	Y
	17	7578412	A	C	TP53	V173G	Y
58	13	32906546	T	C	BRCA2	C311R	Y
	13	32953568	C	T	BRCA2	Q2957X	Y
	17	7579542	C	G	TP53	D49H	Y
59	2	209110118	G	T	IDH1	P149T
	3	178952085	A	G	PIK3CA	H1047R	Y
	5	149513524	G	T	PDGFRB	Q227K
60	7	116397534	A	G	MET	M636V
	13	32915129	T	A	BRCA2	S2213T	Y
61	3	178952085	A	G	PIK3CA	H1047R	Y
	9	98231037	G	A	PTCH1	A749V
62	8	38287284	C	T	FGFR1	V92M	Y
	22	29091722	C	T	CHEK2	S412N
63	2	215593520	G	C	BARD1	I738M
	4	55156573	A	G	PDGFRA	T992A
	5	112178256	A	G	APC	Q2322R
	11	108122686	T	-	ATM	M577fs	Y
	11	108206571	G	A	ATM	Splicing	Y
	12	25398284	C	T	KRAS	G12D	Y
64	1	11269419	C	G	MTOR	E1251Q
	6	161455407	G	A	MAP3K4	R90Q
	17	7573976	-	A	TP53	K351fs	Y
	19	15295112	C	A	NOTCH3	D854Y
65	1	27105685	G	-	ARID1A	E1766fs	Y
	1	27106703	C	-	ARID1A	T2105fs	Y
	1	120548095	C	T	NOTCH2	R91Q
	3	41268766	A	C	CTNNB1	K335T
	3	52436675	T	A	BAP1	R667W
	3	178937755	T	C	PIK3CA	Y644H
	3	178952085	A	G	PIK3CA	H1047R	Y
	5	176517762	C	G	FGFR4	S124R
66	2	29754842	G	T	ALK	L365M
	2	209113135	C	T	IDH1	W124X
	9	133760471	A	G	ABL1	T932A
	12	56480437	A	G	ERBB3	S182G
	16	3929908	T	C	CREBBP	N4D
69	2	178098960	C	G	NFE2L2	D29H	Y
	3	178936082	G	A	PIK3CA	E542K	Y
	5	112111369	G	C	APC	D156H
	12	25398284	C	T	KRAS	G12V	Y
	15	99250871	C	T	IGF1R	L59F
	17	7574023	C	T	TP53	R335H
	17	40474444	T	C	STAT3	I653V	Y
70	1	27023716	G	-	ARID1A	M274fs	Y
	1	115256530	G	T	NRAS	Q61K	Y
	3	178916876	G	A	PIK3CA	R88Q	Y
	3	178937410	G	A	PIK3CA	E600K	Y
	17	37866444	C	T	ERBB2	S250F
71	12	25398220	A	C	KRAS	D33E	Y
73	17	37883100	C	G	ERBB2	D1001E
74	2	29450509	C	T	ALK	E949K
	17	7578271	T	A	TP53	H193L	Y
	19	1221954	T	G	STK11	L290R
75	9	133759509	C	T	ABL1	A611V
	13	32900675	G	A	BRCA2	A186T	Y
76	2	225449692	T	-	CUL3	K12fs	Y
	7	148524338	G	A	EZH2	R216W
	9	21970901	C	A	CDKN2A	E153X	Y
	17	7578525	G	C	TP53	C135W	Y
78	1	27100389	G	T	ARID1A	Q1367H
	1	27100390	G	T	ARID1A	Splicing	Y
	2	29416671	G	A	ALK	Q1428X	Y
	3	52584765	G	A	PBRM1	Q1453X	Y
	17	7577099	C	A	TP53	R280I	Y
	19	10602836	C	G	KEAP1	A248P
80	17	7576910	G	-	TP53	T312fs	Y
81	1	27023367	C	T	ARID1A	P158L
	3	52441192	T	G	BAP1	H193P
	5	112102099	G	A	APC	R71H
	6	161469851	G	T	MAP3K4	D183Y
	13	32912441	A	G	BRCA2	T1317A	Y
	17	29667664	G	T	NF1	Splicing	Y
	22	29107899	C	A	CHEK2	A264S
82	6	161470251	G	T	MAP3K4	G316V
	12	25398284	C	A	KRAS	G12V	Y
	17	7577570	C	T	TP53	M237I	Y
83	7	128852035	C	T	SMO	R703X
	16	3824631	G	A	CREBBP	P741L
	19	1221319	C	T	STK11	P281L	Y
	19	1223125	C	G	STK11	F354L	Y
84	9	139391593	C	T	NOTCH1	V2200M
87	17	7578242	C	A	TP53	V203L	Y
88	5	149513524	G	T	PDGFRB	Q227K
	17	7578550	G	A	TP53	S127F	Y
	17	41209095	G	A	BRCA1	R1751X	Y
	19	10599892	G	A	KEAP1	H562Y
89	2	29543634	C	T	ALK	R510Q	Y
	17	7577539	G	A	TP53	R248W	Y
90	17	7578534	C	G	TP53	K132N	Y
91	9	135771987	-	GCT	TSC1	S1043dup
	12	25398284	C	T	KRAS	G12D	Y
92	4	1795720	C	T	FGFR3	A20V
	13	32913407	G	A	BRCA2	V1639I	Y
96	1	162722887	A	G	DDR2	I29V
	13	32921033	G	C	BRCA2	R2336P	Y
	13	49050979	G	C	RB1	S888T
	16	23646282	G	T	PALB2	P529T
	17	7577535	C	A	TP53	R249M	Y
97	3	178936082	G	A	PIK3CA	E542K	Y
	5	56168785	C	T	MAP3K1	Q547X	Y
	5	56183214	T	A	MAP3K1	L1375X	Y
98	12	46243514	C	-	ARID2	R623fs	Y
	17	7577559	G	A	TP53	S241F	Y
99	2	212483942	T	C	ERBB4	N754S
100	17	7578406	C	T	TP53	R175H	Y
101	1	27094377	G	A	ARID1A	A1029T
	1	27100176	C	-	ARID1A	Y1324fs	Y
	1	27105930	-	G	ARID1A	G1847fs	Y
	5	112174002	G	T	APC	R904I
	9	5081809	A	G	JAK2	D840G
	9	98211549	G	-	PTCH1	P1202fs	Y
	10	104849633	GT	-	NT5C2	H494fs	Y
	12	46205234	-	G	ARID2	F106fs	Y
	12	46245449	T	-	ARID2	S1181fs	Y
	13	32907420	-	A	BRCA2	G602fs	Y
	16	347797	C	T	AXIN1	S570N
	17	37866356	G	A	ERBB2	A221T
103	2	212568853	G	A	ERBB4	T422I
	17	7574002	C	-	TP53	R342fs	Y
	19	10597491	C	T	KEAP1	G571D
104	4	153247288	C	A	FBXW7	H505L	Y
	17	7578239	C	A	TP53	E204X	Y
	17	29550505	C	T	NF1	Q589X	Y
107	5	112116568	G	-	APC	G205fs	Y
	17	7578534	C	G	TP53	K132N	Y
110	17	7578527	A	-	TP53	C135fs	Y
111	4	153244091	C	T	FBXW7	L689Q	Y
	5	56161689	C	T	MAP3K1	R396C
	9	5078334	T	C	JAK2	V674A
	9	98211590	C	T	PTCH1	G1189S	Y
	12	25380276	T	A	KRAS	Q61L	Y
	19	11101825	G	A	SMARCA4	Splicing	Y
	19	17943502	C	T	JAK3	V836M	Y
115	5	112175216	-	A	APC	E1309fs	Y
	16	3778717	T	G	CREBBP	N2111H
	17	7578217	G	A	TP53	T211I	Y
119	3	178936091	G	A	PIK3CA	E545K	Y
	3	178937755	T	C	PIK3CA	Y644H
125	5	149504392	G	A	PDGFRB	R604C
	9	21971036	C	T	CDKN2A	D108N	Y
	11	533874	T	A	HRAS	Q61L	Y
	13	28624250	T	A	FLT3	T242S
	15	99500350	G	C	IGF1R	E1261D
	17	7578371	C	T	TP53	G187S	Y
126	4	55151639	T	G	PDGFRA	L809V
	13	32937474	A	G	BRCA2	D2712G	Y
128	4	55602758	G	C	KIT	W860S
130	15	90631929	T	G	IDH2	I142L
	17	7577106	G	A	TP53	P278S	Y
131	13	32937360	A	C	BRCA2	K2674T	Y
	16	23641752	A	G	PALB2	W575R
	17	7574003	G	A	TP53	R342X	Y
133	9	98270633	G	C	PTCH1	A4G
	17	7577610	T	C	TP53	Splicing	Y
134	17	7577090	C	G	TP53	R283P	Y
135	13	32931977	TT	-	BRCA2	L2573fs	Y
136	10	104860838	A	G	NT5C2	L168P
	22	29091225	C	G	CHEK2	S422T
138	3	178927980	T	C	PIK3CA	C420R	Y
	17	7578265	A	G	TP53	I195T	Y
	19	10600396	C	A	KEAP1	A487S
139	9	135772002	T	C	TSC1	S1039G
	17	7577557	A	G	TP53	C242R	Y
	17	41244778	TAAC	-	BRCA1	923fs	Y
140	3	47127714	G	A	SETD2	R1790W
	7	140453136	A	T	BRAF	V600E	Y
141	3	178952085	A	G	PIK3CA	H1047R	Y
	17	7574017	C	A	TP53	R337L	Y
	17	37873580	A	G	ERBB2	D582G	Y
143	3	47162053	A	G	SETD2	L1229P
	9	139399216	C	T	NOTCH1	A1643T
	13	32913262	GT	-	BRCA2	C1591fs	Y
144	17	41197729	T	C	BRCA1	Y1853C	Y
	19	17945807	T	G	JAK3	T685P
145	17	56787293	G	A	RAD51C	R260Q
146	4	1804675	G	A	FGFR3	R322H
	17	7577121	G	A	TP53	R273C	Y
149	4	153247289	G	C	FBXW7	R505G	Y
	5	56111742	C	G	MAP3K1	H114Q
151	13	28597588	T	C	FLT3	R773G
	17	7578263	G	A	TP53	R196X	Y
152	17	7577570	C	T	TP53	M237I	Y
155	3	47162195	C	A	SETD2	G1182C
	6	161413044	-	CCG	MAP3K4	P27dup	Y
	17	7577139	G	A	TP53	R267W	Y
	17	29585422	A	T	NF1	R1412X	Y
158	2	225368457	C	G	CUL3	R430P
	22	41553269	G	A	EP300	D1120N
159	2	29445223	C	T	ALK	A1168T	Y
	17	7579394	C	-	TP53	P98fs	Y
	17	56798131	A	G	RAD51C	T288A
160	12	25398284	C	T	KRAS	G12D	Y
162	17	7578370	C	A	TP53	Splicing	Y
163	17	7578546	-	G	TP53	A129fs	Y
164	6	161518155	C	A	MAP3K4	C1157X	Y
	7	148507464	C	T	EZH2	D664N	Y
165	2	178098963	T	G	NFE2L2	I28L
	5	35876188	C	T	IL7R	T327M
	17	7578407	G	C	TP53	R175G	Y
168	3	178921553	T	A	PIK3CA	N345K	Y
	13	48939053	TT	-	RB1	F296fs	Y
	17	7579447	A	-	TP53	P80fs	Y
171	4	153247366	C	G	FBXW7	R479P	Y
	9	135786904	A	G	TSC1	M322T	Y
	11	69466033	C	T	CCND1	R291W
	17	7577090	C	G	TP53	R283P	Y
173	9	135772892	C	-	TSC1	E911fs	Y
174	2	225346624	CT	-	CUL3	R671fs	Y
	4	1808883	C	T	FGFR3	P772L
	5	112151259	C	T	APC	P301L
	5	112179014	T	C	APC	S2575P
	5	176523164	A	G	FGFR4	Y603C
	8	128750639	C	T	MYC	A59V	Y
	17	7577539	G	-	TP53	R248fs	Y
	17	41222996	C	G	BRCA1	R1645S	Y
175	17	7579420	G	-	TP53	S90fs	Y
176	17	7578551	AGT	TA	TP53	Y126fs	Y
177	17	7578194	G	A	TP53	P219S
	17	7579311	C	A	TP53	Splicing	Y
178	13	48881520	T	-	RB1	V81fs	Y
	17	7577518	T	A	TP53	I255F	Y
181	5	112173917	C	T	APC	R876X	Y
	6	117662601	C	A	ROS1	V1622F
	9	21971111	G	A	CDKN2A	H83Y	Y
	17	7578508	C	T	TP53	C141Y	Y
182	3	178936082	G	A	PIK3CA	E542K	Y
	4	153249510	C	A	FBXW7	G423V	Y
	17	7577018	C	A	TP53	Splicing	Y
	17	7578479	G	A	TP53	P151S	Y
183	5	112178001	G	A	APC	R2237Q
	12	25398284	C	T	KRAS	G12D	Y
	13	48936983	C	T	RB1	R251X	Y
	17	7578479	G	T	TP53	P151T	Y
	19	1226620	C	T	STK11	R426W
