# Supplementary material for: Comprehensive screening of target molecules by next-generation sequencing in patients with malignant solid tumors: guiding entry into phase I clinical trials
Source: Mol Cancer. 2016 Nov 16;15:73. doi: 10.1186/s12943-016-0553-z (PMC5112718; doi:10.1186/s12943-016-0553-z)
Supplement: Additional file 4: Table S6. — List of identified amplifications. (XLSX 10 kb) [file 12943_2016_553_MOESM4_ESM.xlsx]

## Sheet: Sheet1
Table S6. List of identified amplifications.
Patient	Chr	Gene
10	11	CCND1
	12	MDM2
	15	IGF1R
25	17	ERBB2
37	11	CCND1
46	11	CCND1
48	17	ERBB2
49	8	FGFR1
58	8	MYC
62	11	CCND1
71	17	ERBB2
76	7	EGFR
88	8	MYC
	11	CCND1
89	7	EGFR
91	11	CCND1
100	17	ERBB2
103	8	MYC
	11	CCND1
	17	ERBB2
105	17	ERBB2
110	8	MYC
115	8	MYC
119	12	MDM2
126	17	ERBB2
130	17	ERBB2
133	8	MYC
134	7	EGFR
138	17	ERBB2
141	8	FGFR1
162	17	ERBB2
165	8	MYC
168	11	CCND1
	19	NOTCH3
