# Supplementary material for: Comprehensive screening of target molecules by next-generation sequencing in patients with malignant solid tumors: guiding entry into phase I clinical trials
Source: Mol Cancer. 2016 Nov 16;15:73. doi: 10.1186/s12943-016-0553-z (PMC5112718; doi:10.1186/s12943-016-0553-z)
Supplement: Additional file 5: Table S7. — List of actionable genomic alterations. (XLSX 10 kb) [file 12943_2016_553_MOESM5_ESM.xlsx]

## Sheet: Sheet1
Table S7. List of actionable genomic alterations.
Genomic alteration type	Gene name	Candidate drug
Activating mutations	AKT1	AKT inhibitor
	BRAF	BRAF inhibitor
	DDR2	DDR2 inhibitor
	ERBB2	HER2 inhibitor
	ERBB3	ERBB inhibitor
	FGFR2	FGFR inhibitor
	MAP2K1	MEK inhibitor
	PDGFRB	PDGFR inhibitor
	PIK3CA	PI3K inhibitor, AKT inhibitor
Inactivating mutations	BRCA1	PARP inhibitor
	BRCA2	PARP inhibitor
	CDKN2A	CDK4/6 inhibitor
	NF1	MEK inhibitor
	PTCH1	Hedgehog inhibitor
	TSC1	mTOR inhibitor
Amplifications	CCND1	CDK4/6 inhibitor
	EGFR	EGFR inhibitor, EGFR antibody
	ERBB2	HER2 inhibitor, HER2 antibody
	FGFR1	FGFR inhibitor, FGFR antibody
	MDM2	MDM2 inhibitor
Gene fusion	ROS1	ROS1 inhibitor
