# Supplementary material for: Comprehensive screening of target molecules by next-generation sequencing in patients with malignant solid tumors: guiding entry into phase I clinical trials
Source: Mol Cancer. 2016 Nov 16;15:73. doi: 10.1186/s12943-016-0553-z (PMC5112718; doi:10.1186/s12943-016-0553-z)
Supplement: Additional file 7: Table S4. — Gene list of NCC oncopanel ver. 2. (XLSX 10 kb) [file 12943_2016_553_MOESM7_ESM.xlsx]

## Sheet: Sheet1
Table S4. Gene list of NCC oncopanel ver. 2
Genes for mutations and amplifications	Genes for fusions
ABL1	AKT3
AKT1	ALK
AKT2	BRAF
AKT3	FGFR2
ALK	FGFR3
APC	NOTCH1
ARID1A	NRG1
ARID2	RAF1
ATM	RET
AXIN1	ROS1
BAP1
BARD1
BIM
BRAF
BRCA1
BRCA2
CCND1
CDK4
CDKN2A
CHEK2
CREBBP
CTNNB1
CUL3
DDR2
EGFR
ENO1
EP300
ERBB2
ERBB3
ERBB4
EZH2
FBXW7
FGFR1
FGFR2
FGFR3
FGFR4
FLT3
HRAS
IDH1
IDH2
IGF1R
IGF2
IL7R
JAK1
JAK2
JAK3
KEAP1
KIT
KRAS
MAP2K1
MAP2K4
MAP3K1
MAP3K4
MDM2
MET
MTOR
MYC
MYCN
NF1
NFE2L2
NOTCH1
NOTCH2
NOTCH3
NRAS
NRG1
NT5C2
PALB2
PBRM1
PDGFRA
PDGFRB
PIK3CA
PIK3R1
PTCH1
PTEN
RAC1
RAC2
RAD51C
RAF1
RB1
RET
ROS1
SETD2
SMAD4
SMARCA4
SMO
STAT3
STK11
TP53
TSC1
VHL
