# Supplementary material for: Comprehensive screening of target molecules by next-generation sequencing in patients with malignant solid tumors: guiding entry into phase I clinical trials
Source: Mol Cancer. 2016 Nov 16;15:73. doi: 10.1186/s12943-016-0553-z (PMC5112718; doi:10.1186/s12943-016-0553-z)
Supplement: Additional file 8: Table S2. — DNA quantities used for sequencing library preparation. (XLSX 9 kb) [file 12943_2016_553_MOESM8_ESM.xlsx]

## Sheet: Sheet1
Table S2. DNA quantities used for sequencing library preparation.
Reagent	Quality value	DNA (μg)
SureSelect XT	≥0.8	1, 0.5, 0.25
	0.4 - 0.8	1, 0.5
	0.2 - 0.4	1
	0.1 - 0.2	2
SureSelect XT with KAPA Hyper Prep Kit	≥0.8	0.2, 0.1, 0.05
	0.4 - 0.8	0.2, 0.1
	0.2 - 0.4	0.2
	0.1 - 0.2	0.4
