# Supplementary material for: Comprehensive screening of target molecules by next-generation sequencing in patients with malignant solid tumors: guiding entry into phase I clinical trials
Source: Mol Cancer. 2016 Nov 16;15:73. doi: 10.1186/s12943-016-0553-z (PMC5112718; doi:10.1186/s12943-016-0553-z)
Supplement: Additional file 9: Table S3. — Actionable genomic alterations in histological tumor types. (XLSX 10 kb) [file 12943_2016_553_MOESM9_ESM.xlsx]

## Sheet: Sheet1
Table S3. Actionable genomic alterations in hustlogical tumor types
Cancers	No. of patients	No.of patients with actionable alterations	Frequency
Breast	35	24	0.685714
Gastric	35	16	0.457143
Ovarian	21	7	0.333333
Lung	12	4	0.333333
Bile duct	8	3	0.375
Cervical	5	1	0.2
Others	15	4	0.266667
Total	131	59	0.450382
